# Supplementary material for: Testosterone therapy and cardiovascular events among men: a systematic review and meta-analysis of placebo-controlled randomized trials
Source: Springer Nature journal article supplement (doi:10.1186/1741-7015-11-108), 2013-04-18

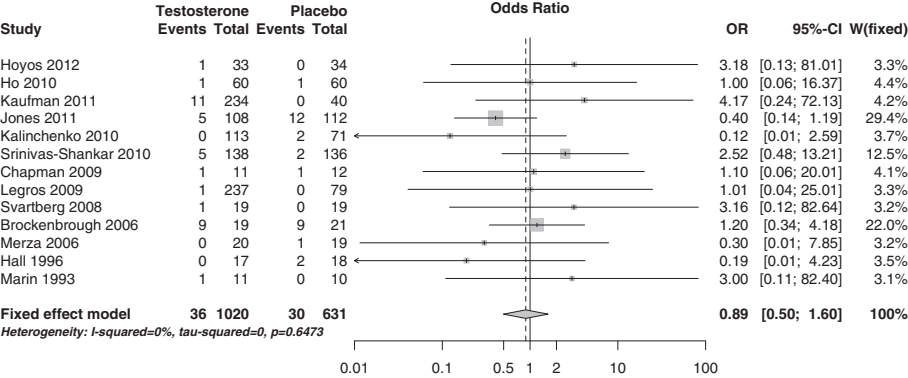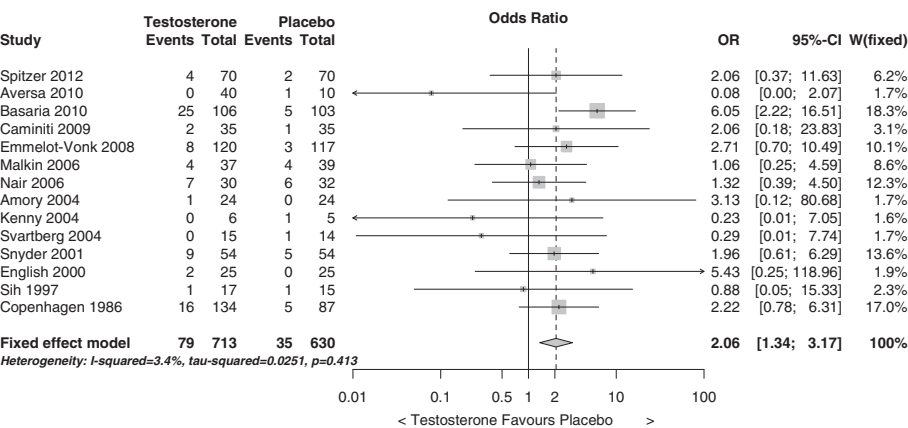

Supplement: 12916_2012_758_MOESM8_ESM.pdf [file 12916_2012_758_MOESM8_ESM.pdf]
